# Supplementary material for: Modulation of gut microbiota and delayed immunosenescence as a result of syringaresinol consumption in middle-aged mice
Source: PubMed Central journal article supplement (PMC5157019; doi:10.1038/srep39026), 2016-12-15
Supplement: srep39026-s1.pdf [file srep39026-s1.pdf]

Modulation of gut microbiota and delayed immunosenescence as a result of syringaresinol consumption in middle-aged mice

Si-Young Cho<sup>1</sup>, Juewon Kim<sup>1</sup>, Ji Hae Lee<sup>1</sup>, Ji Hyun Sim<sup>2</sup>, Dong-Hyun Cho<sup>1</sup>, Il-Hong Bae<sup>1</sup>, Hyunbok Lee<sup>1</sup>, Min A Seol<sup>2,3</sup>, Hyun Mu Shin<sup>2,3,4</sup>, Tae-Joo Kim<sup>2,3</sup>, Dae-Yong Kim<sup>5</sup>, Su-Hyung Lee<sup>5</sup>, Song Seok Shin<sup>1</sup>, Sin-Hyeog Im<sup>6,7\*</sup> and Hang-Rae Kim<sup>2,3,4\*</sup>

<sup>1</sup> R&D Unit, AmorePacific Corporation, Gyeonggi-do 17074, Republic of Korea

<sup>2</sup>Department of Anatomy and Cell Biology, <sup>3</sup>Department of Biomedical Sciences, and <sup>4</sup>BK21Plus Biomedical Science Project, Seoul National University College of Medicine, Seoul 03080, Republic of Korea

<sup>5</sup>College of Veterinary Medicine, Seoul National University, Seoul 08826, Republic of Korea

<sup>6</sup>Academy of Immunology and Microbiology (AIM), Institute for Basic Science (IBS), Pohang, 790-784, Republic of Korea.

<sup>7</sup>Division of Integrative Biosciences and Biotechnology (IBB), Pohang University of Science and Technology, Pohang, 790-784, Republic of Korea.

\*Correspondence:

Hang-Rae Kim, D.V.M., Ph.D.

Department of Anatomy and Cell Biology, Department of Biomedical Biosciences, Seoul National University College of Medicine, 103 Daehak-ro, Jongno-gu, Seoul 03080, Republic of Korea. Phone: (82) 2-740-8214, Fax: (82) 2-745-9528, E-mail: hangrae2@snu.ac.kr

or

Sin-Hyeog Im, Ph.D.

Address: Academy of Immunology and Microbiology (AIM), Institute for Basic Science (IBS), Academy of Immunology and Microbiology (AIM), Institute for Basic Science (IBS), Pohang, Republic of Korea; Division of Integrative Biosciences and Biotechnology (IBB), Pohang University of Science and Technology, Pohang, Republic of Korea 790-784; Tel: 82-54-279-2356; FAX: 82-54-279-8768; Email: iimsh@postech.ac.kr

Figure S1

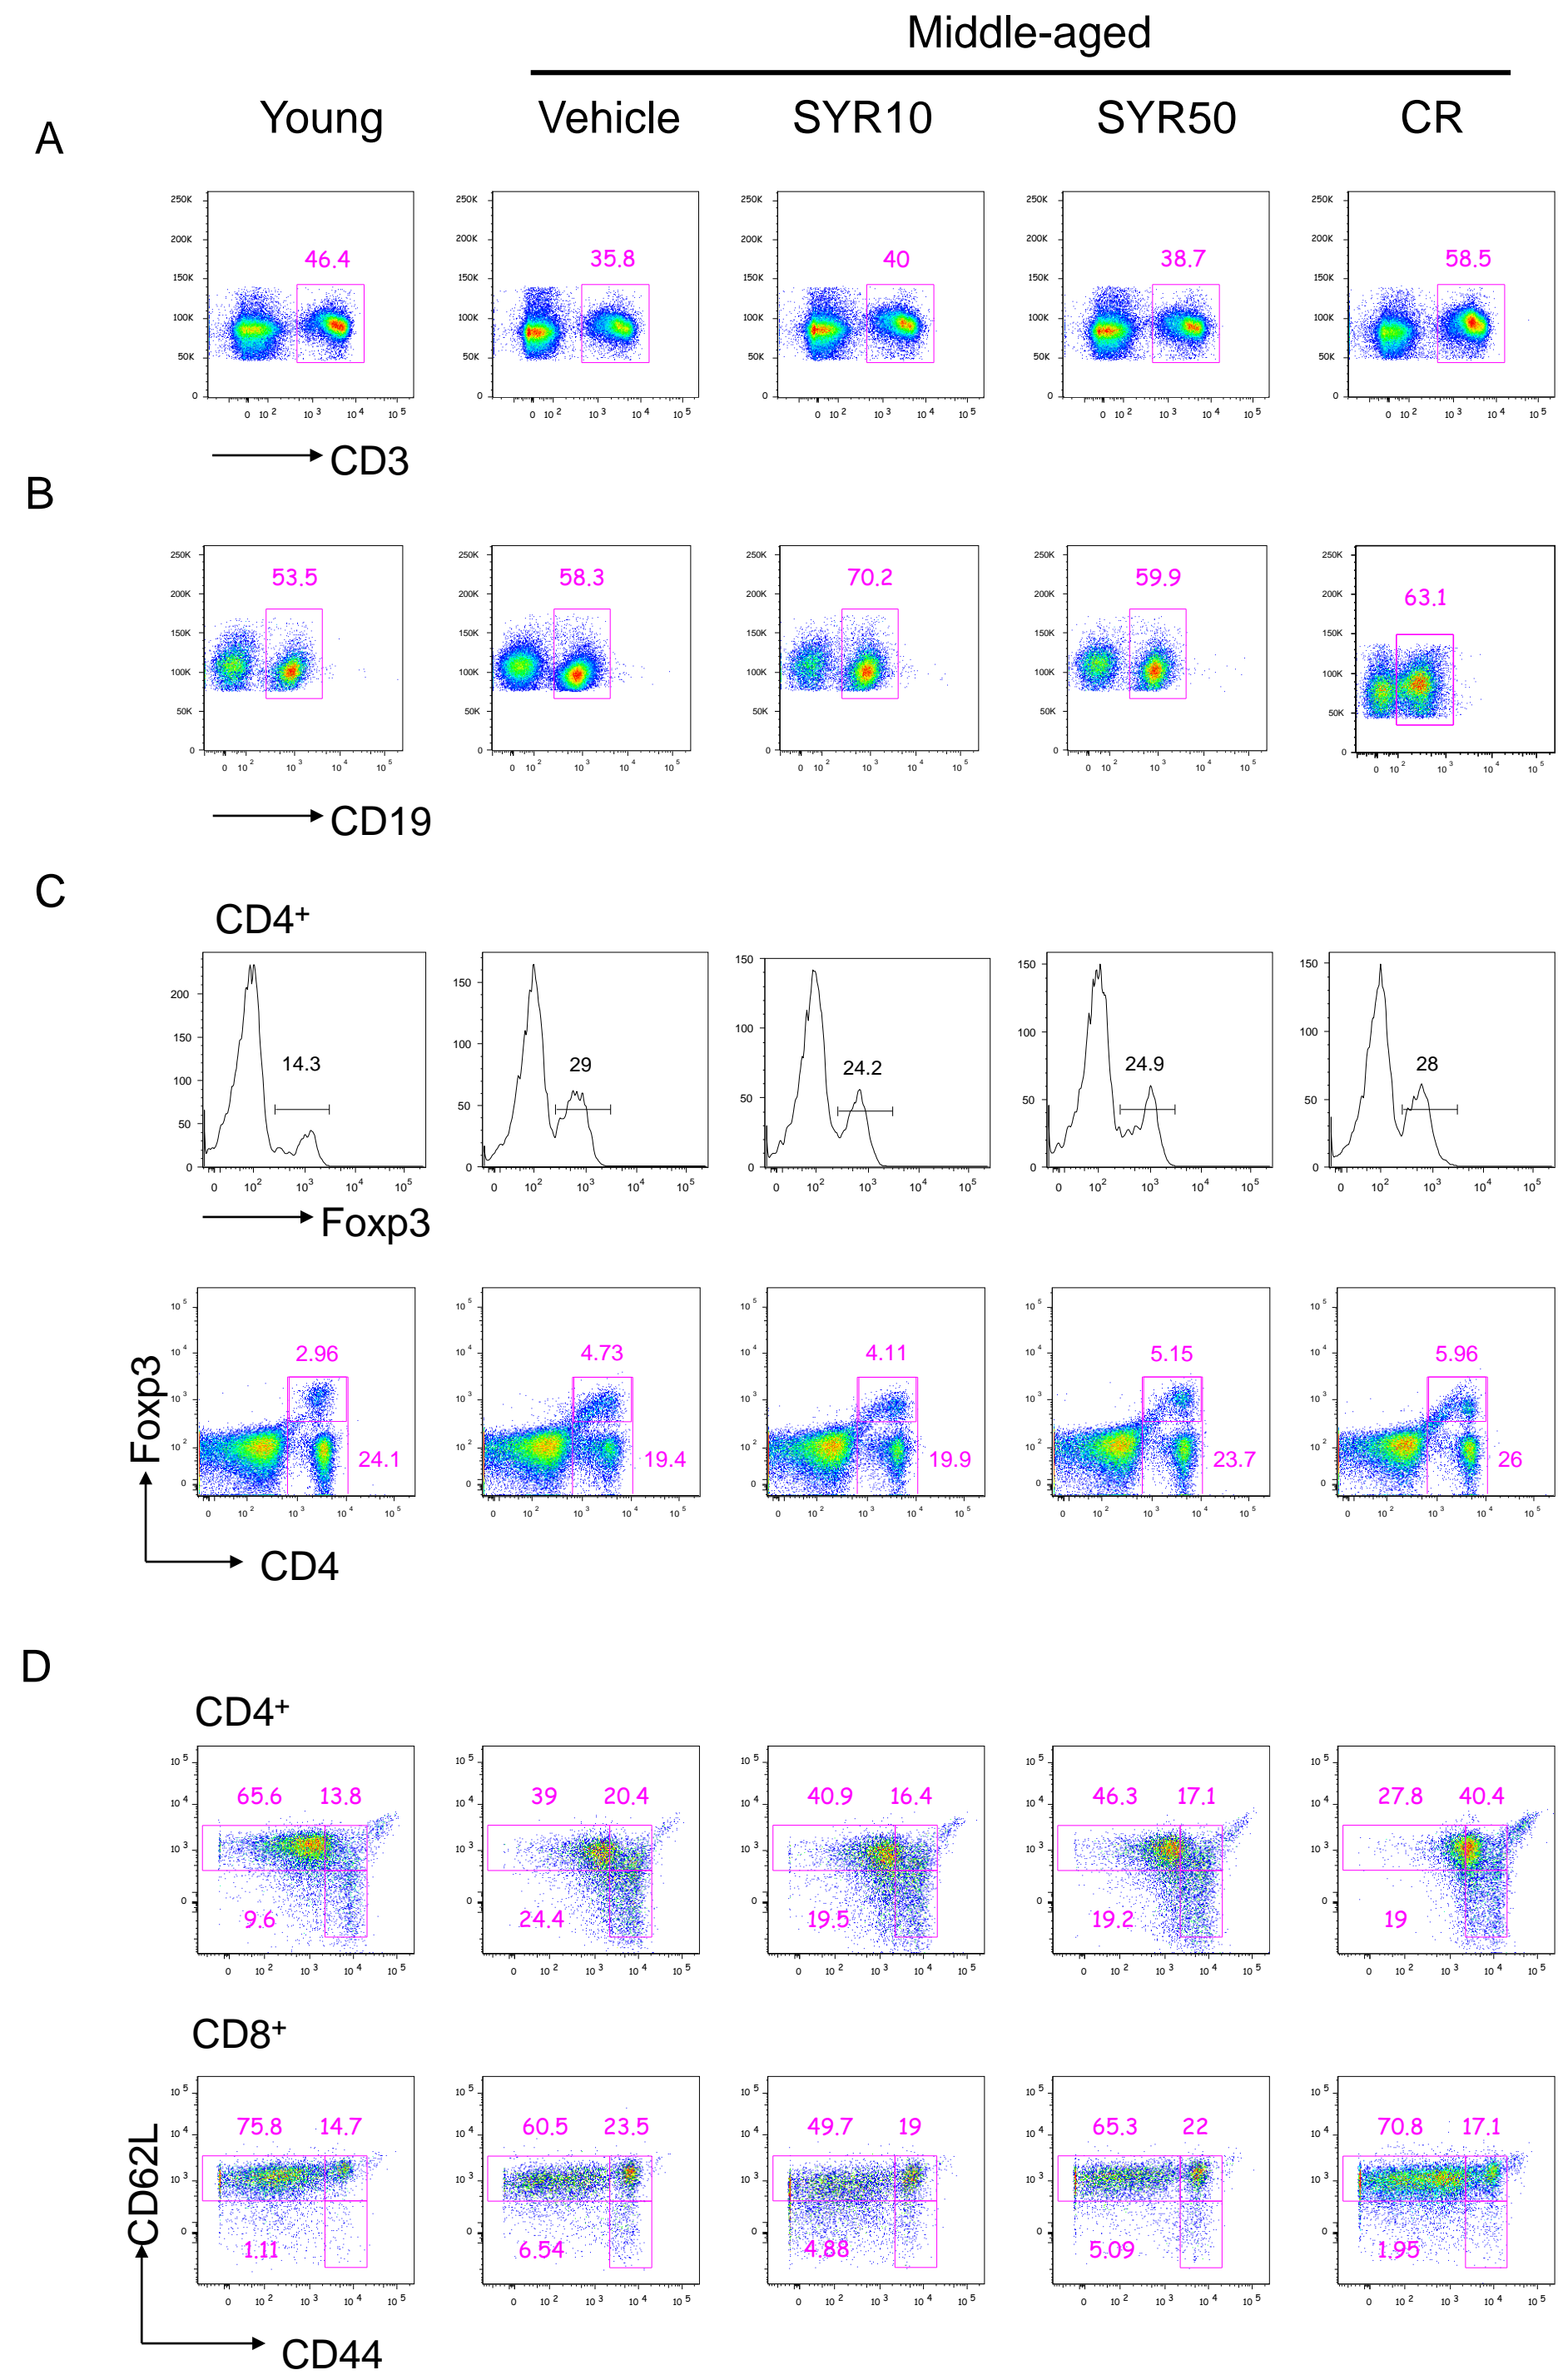

**Figure S1. Representative dot plots of lymphocyte subsets from spleen.**

Middle-aged mice (each group n = 6) were treated with vehicle (control) 10 mg/kg SYR, 50 mg/kg SYR or CR for 10 weeks and their splenocytes analyzed by flow cytometry. Young mice were used as age-mismatched controls. Representative flow cytometric data for frequencies of (A) CD3+ T cells, (B) CD19+ B cells, (C) foxp3+ Treg of CD4+ T cells, and (D) T-cell subsets, such as naïve T cells (CD62L+CD44-), central memory T cells (CD62L+CD44+), and effector memory T cells (CD62L-CD44+) are shown.

Figure S2

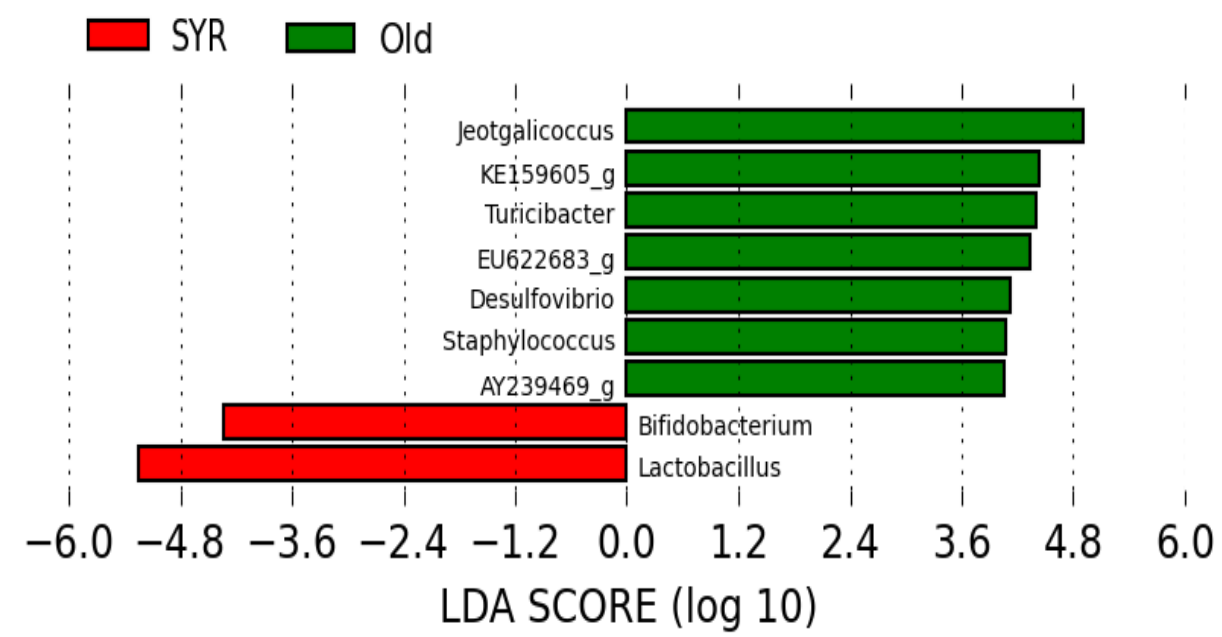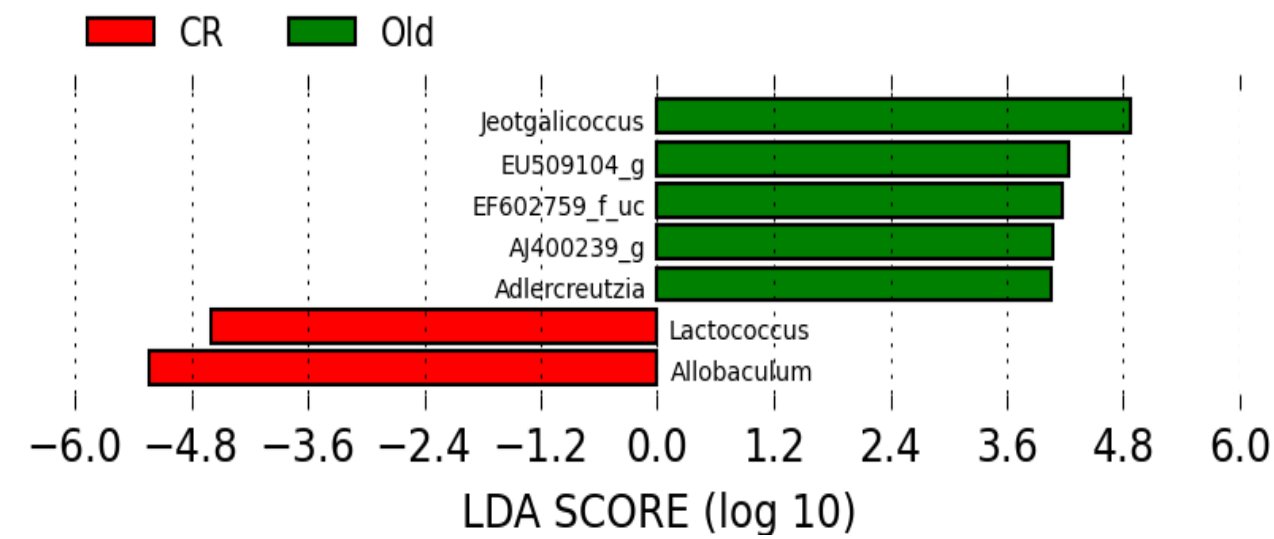

**Figure S2. Key phlotypes of the microbiota of cecal contents of middle-aged mice** (A) Taxonomic differences between vehicle control and 50 mg/kg SYR-treated middle-aged mice. (B) Taxonomic differences between vehicle control and CR-treated middle-aged mice. Significant differences in LDA scores ( $p < 0.05$ ) were evident among genera (Kruskal–Wallis test) and between subclasses (Wilcoxon’s test). The threshold logarithmic LDA score was 4.0.

Table S1. Effects of SYR and CR treatment on body weight and glucose levels.

|                         | Vehicle      | SYR 10       | SYR 50       | CR                           |
|-------------------------|--------------|--------------|--------------|------------------------------|
| Initial Body weight (g) | 35.5 ± 0.94  | 35.39 ± 0.91 | 35.53 ± 0.77 | 35.5 ± 0.67                  |
| Body weight gain (g)    | -0.34 ± 0.92 | -0.24 ± 1.02 | -0.16 ± 0.85 | -10.33 ± 0.55 <sup>***</sup> |
| Food intake (g/day)     | 3.57 ± 0.03  | 3.61 ± 0.03  | 3.57 ± 0.02  | 2.47 ± 0 <sup>***</sup>      |
| Glucose (mg/dl)         | 129.3 ± 5.69 | 124 ± 5.29   | 110.8 ± 4.57 | 100 ± 2.91 <sup>**</sup>     |

Middle-aged mice (44 weeks old) were subjected to vehicle (control), 10 mg/kg SYR (SYR 10), 50 mg/kg SYR (SYR 50) or 30% CR treatment for 10 weeks (n = 6, group). All results are expressed as means ± SEM. Statistical analyses were performed using one-way ANOVA followed by Dunnett's post hoc test. \*\*  $P < 0.01$ , \*\*\*  $P < 0.001$  versus the untreated middle-aged control group. Experiments were repeated three times. Data are the averages of three independent experiments.

Table S2. Frequencies of splenic leukocyte subpopulations.

| Frequency (%)<br><i>P</i> value                      | Young mice        | Middle-aged mice |                   |                   |                   |
|------------------------------------------------------|-------------------|------------------|-------------------|-------------------|-------------------|
|                                                      |                   | Vehicle          | SYR10             | SYR50             | CR                |
| CD3 <sup>+</sup> T cells                             | 43 ± 1.3<br>***   | 33.8 ± 2.1       | 37.7 ± 1.8<br>ns  | 41.5 ± 1.2<br>*** | 50.0 ± 2.4<br>*** |
| CD3 <sup>+</sup> CD4 <sup>+</sup>                    | 24.2 ± 0.7<br>*** | 16.8 ± 0.7       | 19.9 ± 0.7<br>*   | 21.2 ± 0.6<br>*** | 17.1 ± 0.8<br>ns  |
| CD3 <sup>+</sup> CD8 <sup>+</sup>                    | 16.5 ± 1.0<br>*   | 12.9 ± 0.6       | 14.9 ± 1.0<br>ns  | 16.3 ± 0.5<br>*   | 29.0 ± 1.0<br>*** |
| CD4 <sup>+</sup> /CD3 <sup>+</sup>                   | 55.1 ± 1.0<br>ns  | 51.2 ± 0.5       | 52.0 ± 1.0<br>ns  | 51.3 ± 0.5<br>ns  | 34.2 ± 1.9<br>*** |
| CD8 <sup>+</sup> /CD3 <sup>+</sup>                   | 38.1 ± 1.1<br>ns  | 39.3 ± 0.6       | 40.4 ± 1.0<br>ns  | 40.8 ± 0.4<br>ns  | 57.6 ± 1.3<br>*** |
| Naïve/CD4 <sup>+</sup>                               | 72.3 ± 0.9<br>*** | 47.23 ± 1.5      | 50.3 ± 0.7<br>ns  | 53.6 ± 1.0<br>**  | 64.8 ± 1.4<br>*** |
| Naïve/CD8 <sup>+</sup>                               | 72.0 ± 0.9<br>*** | 55.4 ± 1.5       | 55.4 ± 2.3<br>ns  | 63.1 ± 0.8<br>*   | 72.2 ± 2.1<br>*** |
| Foxp3 <sup>+</sup> CD4 <sup>+</sup><br>(Tregs)       | 2.36 ± 0.1<br>*** | 4.29 ± 0.4       | 3.7 ± 0.2<br>ns   | 3.9 ± 0.1<br>ns   | 3.6 ± 0.3<br>ns   |
| Treg/CD4 <sup>+</sup>                                | 13.9 ± 0.5<br>*** | 34.7 ± 3.2       | 24.9 ± 0.7<br>**  | 24.0 ± 0.2<br>**  | 28.7 ± 2.33<br>ns |
| CD19 <sup>+</sup> B cells                            | 33.7 ± 1.3<br>*** | 47.8 ± 1.5       | 37.9 ± 1.6<br>*** | 36.6 ± 1.0<br>*** | 30.9 ± 1.6<br>*** |
| Transitional<br>B/CD19 <sup>+</sup>                  | 15.5 ± 1.1<br>*** | 5.7 ± 0.2        | 6.05 ± 0.3<br>ns  | 6.0 ± 0.7<br>ns   | 3.5 ± 0.3<br>ns   |
| FOB/CD19 <sup>+</sup>                                | 47.1 ± 3.2<br>*** | 62.8 ± 0.8       | 65.4 ± 1.0<br>ns  | 63.4 ± 1.1<br>ns  | 57.6 ± 2.3<br>ns  |
| MZB/CD19 <sup>+</sup>                                | 7.59 ± 1.2<br>**  | 13.7 ± 1.0       | 13.7 ± 1.3<br>ns  | 14.4 ± 0.9<br>ns  | 22.1 ± 1.7<br>*** |
| Dendritic cells<br>(CD11c <sup>+</sup> )             | 2.03 ± 0.1<br>ns  | 2.02 ± 0.15      | 2.07 ± 0.10<br>ns | 2.30 ± 0.3<br>ns  | 1.17 ± 0.10<br>** |
| Monocytes<br>(CD11b <sup>+</sup> Ly6C <sup>+</sup> ) | 0.27 ± 0.05<br>ns | 0.28 ± 0.04      | 0.30 ± 0.03<br>ns | 0.28 ± 0.02<br>ns | 0.37 ± 0.06<br>ns |
| Granulocytes<br>CD11b <sup>+</sup> Ly6G <sup>+</sup> | 1.06 ± 0.3<br>ns  | 0.47 ± 0.10      | 0.57 ± 0.1<br>ns  | 0.37 ± 0.06<br>ns | 0.41 ± 0.07<br>ns |

Middle-aged mice were subjected to vehicle (control), 10 mg/kg SYR (SYR 10), 50 mg/kg SYR (SYR 50) or 30% CR treatment for 10 weeks (n=6, group). Young mice were used as age-mismatched controls. All data are expressed as means ± SEM. Statistical analysis were performed using one-way ANOVA followed by Dunnett's post hoc test. \* *P* < 0.05, \*\* *P* < 0.01, \*\*\* *P* < 0.001 versus the untreated middle-aged control group; ns, non-significant. Transitional B; CD21<sup>+</sup>CD23<sup>+</sup>, follicular B cells (FOB); CD21<sup>+</sup>CD23<sup>++</sup>, marginal zone B cells

(MZB); CD21<sup>++</sup>CD23<sup>+</sup>.

Table S3. Numbers of splenic leukocyte subpopulations.

| Number<br><i>P</i> value                               | Young mice              | Middle-aged mice |                       |                       |                        |
|--------------------------------------------------------|-------------------------|------------------|-----------------------|-----------------------|------------------------|
|                                                        |                         | Vehicle          | SYR10                 | SYR50                 | CR                     |
| Splenocytes ( $\times 10^7$ )                          | 20.3 $\pm$ 2.6<br>***   | 38.6 $\pm$ 2.4   | 35.7 $\pm$ 1.1<br>ns  | 30.2 $\pm$ 2.3<br>*   | 6.56 $\pm$ 0.7<br>***  |
| CD3 <sup>+</sup> ( $\times 10^6$ )                     | 16.2 $\pm$ 2.4<br>ns    | 18.7 $\pm$ 2.4   | 23.4 $\pm$ 1.0<br>ns  | 22.1 $\pm$ 1.4<br>ns  | 8.1 $\pm$ 0.8<br>***   |
| CD3 <sup>+</sup> CD4 <sup>+</sup> ( $\times 10^6$ )    | 9.01 $\pm$ 1.4<br>ns    | 9.7 $\pm$ 1.1    | 12.2 $\pm$ 0.8<br>ns  | 11.7 $\pm$ 0.9<br>ns  | 2.6 $\pm$ 0.4<br>***   |
| CD3 <sup>+</sup> CD8 <sup>+</sup> ( $\times 10^6$ )    | 6.09 $\pm$ 0.8<br>ns    | 7.48 $\pm$ 0.9   | 9.1 $\pm$ 0.5<br>ns   | 9.05 $\pm$ 0.5<br>ns  | 4.3 $\pm$ 0.4<br>**    |
| Treg ( $\times 10^6$ )                                 | 0.475 $\pm$ 0.06<br>*** | 1.56 $\pm$ 0.14  | 1.40 $\pm$ 0.12<br>ns | 1.19 $\pm$ 0.10<br>*  | 0.23 $\pm$ 0.02<br>*** |
| CD19 <sup>+</sup> ( $\times 10^6$ )                    | 14.2 $\pm$ 2.4<br>***   | 30.5 $\pm$ 2.6   | 26.6 $\pm$ 2.9<br>ns  | 22.9 $\pm$ 2.8<br>ns  | 4.8 $\pm$ 0.7<br>***   |
| Dendritic cells ( $\times 10^6$ )                      | 0.61 $\pm$ 0.10<br>ns   | 1.06 $\pm$ 0.12  | 1.09 $\pm$ 0.12<br>ns | 1.08 $\pm$ 0.26<br>ns | 0.12 $\pm$ 0.01<br>*** |
| CD11b <sup>+</sup> Ly6C <sup>+</sup> ( $\times 10^6$ ) | 0.08 $\pm$ 0.02<br>ns   | 0.15 $\pm$ 0.03  | 0.14 $\pm$ 0.02<br>ns | 0.13 $\pm$ 0.02<br>ns | 0.04 $\pm$ 0.01<br>**  |
| CD11b <sup>+</sup> Ly6G <sup>+</sup> ( $\times 10^6$ ) | 0.36 $\pm$ 0.1<br>ns    | 0.26 $\pm$ 0.07  | 0.28 $\pm$ 0.05<br>ns | 0.16 $\pm$ 0.02<br>ns | 0.05 $\pm$ 0.01<br>ns  |

Middle-aged mice were subjected to vehicle (control), 10 mg/kg SYR (SYR 10), 50 mg/kg SYR (SYR 50) or 30% CR treatment for 10 weeks (n=6, group). Young mice were used as age-mismatched controls. All data are expressed as means  $\pm$  SEM. Statistical analysis were performed using one-way ANOVA followed by Dunnett's post hoc test. \*  $P < 0.05$ , \*\*  $P < 0.01$ , \*\*\*  $P < 0.001$  versus the untreated middle-aged control group; ns, non-significant.

Table S4. Summary of analysis of sequences obtained from cecal contents.

| Treat            | Number of subjects | Analyzed reads | Normalized reads | Observed OTUs | Estimated OTUs (Chao1) | Shannon diversity index | Good's coverage |      |
|------------------|--------------------|----------------|------------------|---------------|------------------------|-------------------------|-----------------|------|
| Young mice       | Y1                 | 5245           | 3600             | 576           | 1117.8                 | 4.95                    | 0.92            |      |
|                  | Y2                 | 5162           | 3600             | 424           | 898                    | 4.33                    | 0.93            |      |
|                  | Y3                 | 3760           | 3600             | 578           | 1282.2                 | 5.01                    | 0.92            |      |
|                  | Y4                 | 5069           | 3600             | 443           | 712.9                  | 4.30                    | 0.94            |      |
|                  | Y5                 | 4803           | 3600             | 559           | 1153.8                 | 4.58                    | 0.91            |      |
|                  | Y6                 | 5579           | 3600             | 521           | 1171                   | 3.99                    | 0.92            |      |
|                  |                    |                |                  |               | 1056±85.72             | 4.53±0.162              |                 |      |
| Vehicle          | O1                 | 6273           | 3600             | 211           | 356.5                  | 2.63                    | 0.97            |      |
|                  | O2                 | 5904           | 3600             | 275           | 408.2                  | 3.72                    | 0.97            |      |
|                  | O3                 | 5281           | 3600             | 454           | 701.6                  | 4.58                    | 0.94            |      |
|                  | O4                 | 3847           | 3600             | 359           | 570.5                  | 4.46                    | 0.96            |      |
|                  | O5                 | 4548           | 3600             | 397           | 581.7                  | 4.45                    | 0.96            |      |
|                  | O6                 | 5812           | 3600             | 326           | 574.1                  | 3.84                    | 0.96            |      |
|                  |                    |                |                  |               | 532.1±51.84            | 3.95±0.301              |                 |      |
| Middle-aged mice | SYR 10             | SYRL1          | 3413             | 2147          | 424                    | 757.8                   | 5.08            | 0.90 |
|                  |                    | SYRL2          | 3427             | 2147          | 428                    | 765.6                   | 4.73            | 0.90 |
|                  |                    | SYRL3          | 3925             | 3600          | 387                    | 695                     | 4.32            | 0.95 |
|                  |                    | SYRL4          | 2147             | 2147          | 373                    | 532.4                   | 4.83            | 0.93 |
|                  |                    | SYRL5          | 3967             | 3600          | 424                    | 685.9                   | 4.48            | 0.95 |
|                  |                    | SYRL6          | 2286             | 2147          | 329                    | 581.9                   | 4.76            | 0.93 |
|                  |                    |                |                  |               |                        | 669.8±38.48             | 4.70±0.109      |      |
|                  | SYR50              | SYRH1          | 4073             | 3600          | 141                    | 233.8                   | 2.79            | 0.98 |
|                  |                    | SYRH2          | 3817             | 3600          | 195                    | 304.4                   | 2.82            | 0.98 |
|                  |                    | SYRH3          | 3148             | 2147          | 138                    | 238.8                   | 3.07            | 0.97 |
|                  |                    | SYRH4          | 3605             | 3600          | 197                    | 296.6                   | 3.03            | 0.98 |
|                  |                    | SYRH5          | 2535             | 2147          | 186                    | 380.1                   | 3.01            | 0.96 |
| SYRH6            |                    | 3628           | 3600             | 259           | 443.0                  | 3.81                    | 0.97            |      |
|                  |                    |                |                  |               | 316.1±33.40            | 3.09±0.152              |                 |      |
| CR               | CR1                | 5132           | 3600             | 272           | 496.1                  | 3.75                    | 0.96            |      |
|                  | CR2                | 4746           | 3600             | 200           | 308                    | 3.15                    | 0.98            |      |
|                  | CR3                | 4537           | 3600             | 255           | 389.6                  | 3.17                    | 0.97            |      |
|                  | CR4                | 4415           | 3600             | 411           | 717.2                  | 4.26                    | 0.94            |      |
|                  | CR5                | 4219           | 3600             | 249           | 431.8                  | 3.31                    | 0.97            |      |
|                  | CR6                | 2850           | 2147             | 204           | 338.1                  | 3.48                    | 0.96            |      |
|                  |                    |                |                  |               | 446.8±60.59            | 3.52±0.174              |                 |      |

Middle-aged mice were subjected to vehicle (control), 10 mg/kg SYR (SYR 10), 50 mg/kg SYR (SYR 50) or 30%



CR treatment for 10 weeks (n=6, group). Young mice were used as age-mismatched controls. Mean  $\pm$  SEM.

Table S5. Relative abundance (% of total 16S rDNA) of the most representative genus in cecal contents.

| Taxon                                                                                                  | Young mice      | Middle-aged mice |                  |                  |                 |
|--------------------------------------------------------------------------------------------------------|-----------------|------------------|------------------|------------------|-----------------|
|                                                                                                        |                 | Vehicle          | SYR10            | SYR50            | CR              |
| <i>Firmicutes;;Bacilli;;Lactobacillales;;Lactobacillaceae;;Lactobacillus</i>                           | 23.8 $\pm$ 3.46 | 2.13 $\pm$ 0.46  | 1.6 $\pm$ 0.82   | 38.3 $\pm$ 7.8   | 1.80 $\pm$ 0.62 |
|                                                                                                        | ns              |                  | ns               | 0.022            | ns              |
| <i>Firmicutes;;Erysipelotrichi;;Erysipelotrichales;;Allobaculum_f;;Allobaculum</i>                     | 0               | 2.01 $\pm$ 1.55  | 0.03 $\pm$ 0.03  | 16.97 $\pm$ 10.8 | 35.7 $\pm$ 5.64 |
|                                                                                                        | ns              |                  | ns               | ns               | 0.0022          |
| <i>Firmicutes;;Erysipelotrichi;;Erysipelotrichales;;Allobaculum_f;;EF603943_g</i>                      | 0               | 10.8 $\pm$ 5.43  | 10.80 $\pm$ 3.99 | 19.35 $\pm$ 8.16 | 2.02 $\pm$ 0.48 |
|                                                                                                        | 0.0088          |                  | ns               | ns               | ns              |
| <i>Firmicutes;;Bacilli;;Bacillales;;Staphylococcaceae;;Jeotgali coccus</i>                             | 0.06 $\pm$ 0.05 | 19.75 $\pm$ 6.99 | 1.43 $\pm$ 0.92  | 1.02 $\pm$ 0.82  | 5.81 $\pm$ 2.24 |
|                                                                                                        | 0.0007          |                  | 0.0057           | 0.0431           | ns              |
| <i>Firmicutes;;Clostridia;;Clostridiales;;Lachnospiraceae;;Hungatella</i>                              | 7.19 $\pm$ 0.99 | 3.68 $\pm$ 1.57  | 7.58 $\pm$ 1.43  | 0.97 $\pm$ 0.38  | 2.0 $\pm$ 0.36  |
|                                                                                                        | ns              |                  | ns               | ns               | ns              |
| <i>Firmicutes;;Clostridia;;Clostridiales;;Lachnospiraceae;;AB626958_g</i>                              | 3.68 $\pm$ 0.65 | 5.22 $\pm$ 1.85  | 4.44 $\pm$ 0.69  | 0.79 $\pm$ 0.25  | 1.42 $\pm$ 0.54 |
|                                                                                                        | ns              |                  | ns               | ns               | ns              |
| <i>Firmicutes;;Clostridia;;Clostridiales;;Lachnospiraceae;;Lachnospiraceae_uc</i>                      | 9.65 $\pm$ 2.42 | 1.43 $\pm$ 0.42  | 0.39 $\pm$ 0.35  | 0.38 $\pm$ 0.14  | 1.20 $\pm$ 0.31 |
|                                                                                                        | 0.0192          |                  | ns               | ns               | ns              |
| <i>Firmicutes;;Erysipelotrichi;;Erysipelotrichales;;Erysipelotrichales_uc;;Erysipelotrichales_uc_g</i> | 0               | 2.84 $\pm$ 1.99  | 4.96 $\pm$ 1.80  | 4.40 $\pm$ 1.91  | 8.67 $\pm$ 3.72 |
|                                                                                                        | ns              |                  | ns               | ns               | ns              |
| <i>Proteobacteria;;Deltaproteobacteria;;Desulfovibrionales;;Desulfovibrionaceae;;Desulfovibrio</i>     | 0               | 2.85 $\pm$ 0.67  | 2.30 $\pm$ 0.42  | 0.19 $\pm$ 0.07  | 8.21 $\pm$ 2.39 |
|                                                                                                        | 0.0022          |                  | ns               | 0.0022           | ns              |
| <i>Firmicutes;;Clostridia;;Clostridiales;;Lachnospiraceae;;KE159605_g</i>                              | 3.56 $\pm$ 1.54 | 5.00 $\pm$ 4.44  | 2.54 $\pm$ 1.03  | 0.16 $\pm$ 0.05  | 0.58 $\pm$ 0.12 |

|                                                                                                 |             |             |             |             |             |
|-------------------------------------------------------------------------------------------------|-------------|-------------|-------------|-------------|-------------|
|                                                                                                 | ns          |             | ns          | 0.0281      | ns          |
| <i>Firmicutes;;Erysipelotrichi;;Turicibacter_o;;Turicibacter_f;;Turicibacter</i>                | 0.05 ± 0.03 | 4.52 ± 2.23 | 4.84 ± 0.77 | 0.02 ± 0.02 | 4.46 ± 1.79 |
|                                                                                                 | ns          |             | ns          | 0.0363      | ns          |
| <i>Bacteroidetes;;Bacteroidia;;Bacteroidales;;EF602759_f;;EU622683_g</i>                        | 0           | 3.86 ± 2.36 | 3.71 ± 3.12 | 0           | 2.31 ± 1.02 |
|                                                                                                 | 0.0248      |             | ns          | 0.0248      | ns          |
| <i>Verrucomicrobia;;Verrucomicrobiae;;Verrucomicrobiales;;Akkermansia_f;;Akkermansia</i>        | 0.11 ± 0.09 | 2.41 ± 1.34 | 0.14 ± 0.08 | 0.44 ± 0.33 | 3.84 ± 3.10 |
|                                                                                                 | ns          |             | ns          | ns          | ns          |
| <i>Firmicutes;;Erysipelotrichi;;Erysipelotrichales;;Allobaculum_f;;Allobaculum_f_uc</i>         | 0           | 3.34 ± 3.05 | 0           | 1.66 ± 0.51 | 4.01 ± 0.57 |
|                                                                                                 | ns          |             | ns          | ns          | ns          |
| <i>Bacteroidetes;;Bacteroidia;;Bacteroidales;;Bacteroidaceae;;Bacteroides</i>                   | 8.37 ± 2.98 | 0.02 ± 0.2  | 0.62 ± 0.44 | 0           | 0           |
|                                                                                                 | 0.0022      |             | ns          | ns          | ns          |
| <i>Actinobacteria;;Actinobacteria_c;;Bifidobacteriales;;Bifidobacteriaceae;;Bifidobacterium</i> | 0.01 ± 0    | 1.19 ± 0.53 | 0           | 5.60 ± 1.1  | 1.94 ± 0.95 |
|                                                                                                 | ns          |             | ns          | 0.065       | ns          |

Middle-aged mice were subjected to vehicle (control), 10 mg/kg SYR (SYR 10), 50 mg/kg SYR (SYR 50) or 30% CR treatment for 10 weeks (n=6, group). Young mice were used as age-mismatched controls. Results are expressed as means ± SEM of the relative abundance (% of total 16S rDNA) of the genera detected in cecal samples by 16S rDNA pyrosequencing. Statistical analyses were performed using the Kruskal–Wallis test followed by Mann–Whitney U-test. *P* values were obtained by comparison of young, SYR 10, SYR 50 and CR groups with the untreated middle-aged control group; ns, non-significant.

Table S6. Pharmacokinetic properties of SYR.

|                                | I.V. (1 mg/kg) | Oral (2 mg/kg) | Oral (20 mg/kg) |
|--------------------------------|----------------|----------------|-----------------|
| t <sub>max</sub> (h)           | -              | 0.17 ± 0.0     | 0.63 ± 0.9      |
| C <sub>max</sub> (ng/mL)       | -              | 115.0 ± 27.3   | 776.2 ± 205.3   |
| AUC <sub>(0-t)</sub> (ng·h/mL) | 165.1 ± 32.8   | 197.2 ± 130.6  | 2,436.5 ± 561.2 |
| AUC <sub>0-∞</sub> (ng·h/mL)   | 166.0 ± 33.5   | -              | -               |
| t <sub>1/2</sub> (h)           | 0.16 ± 0.02    | -              | -               |
